# Supplementary material for: CRISPR/Cas9-mediated ablation of elovl2 in Atlantic salmon (Salmo salar L.) inhibits elongation of polyunsaturated fatty acids and induces Srebp-1 and target genes
Source: PubMed Central journal article supplement (PMC6525179; doi:10.1038/s41598-019-43862-8), 2019-05-17
Supplement: 41598_2019_43862_MOESM1_ESM.pdf [file 41598_2019_43862_MOESM1_ESM.pdf]

**CRISPR/Cas9-mediated ablation of *elovl2* in Atlantic salmon (*Salmo salar* L.) inhibits elongation of polyunsaturated fatty acids and induces Srebp-1 and target genes**

Alex K. Datsomor <sup>1</sup>, Nikola Zic <sup>1+</sup>, Keshuai Li <sup>1,4+</sup>, Rolf E. Olsen <sup>1,2+</sup>, Yang Jin <sup>3</sup>, Jon Olav Vik <sup>3</sup>, Rolf B. Edvardsen <sup>2</sup>, Fabian Grammes <sup>3</sup>, Anna Wargelius <sup>2\*</sup>, Per Winge <sup>1\*</sup>

<sup>1</sup>Norwegian University of Science and Technology, Department of Biology, Trondheim, N-7491, Norway

<sup>2</sup>Institute of Marine Research, Bergen, NO-5817, Norway

<sup>3</sup>Norwegian University of Life Sciences, Department of Animal and Aquacultural Sciences, N-1432 Ås, Norway

<sup>4</sup>BioMar AS, Trondheim, Norway

\*Corresponding authors: per.winge@ntnu.no, anna.wargelius@hi.no

+these authors contributed equally

Alex K. Datsomor: alex.datsomor@ntnu.no

Nikola Zic: nikolaz@stud.ntnu.no

Keshuai Li: Keshuai.Li@biomar.no

Rolf E. Olsen: rolf.e.olsen@ntnu.no

Yang Jin: yang.jin@nmbu.no

Jon Olav Vik: jon.vik@nmbu.no

Rolf B. Edvardsen: rolf.brudvik.edvardsen@hi.no

Fabian Grammes: fabian.grammes@nmbu.no

Anna Wargelius: anna.wargelius@hi.no

Per Winge: per.winge@ntnu.no

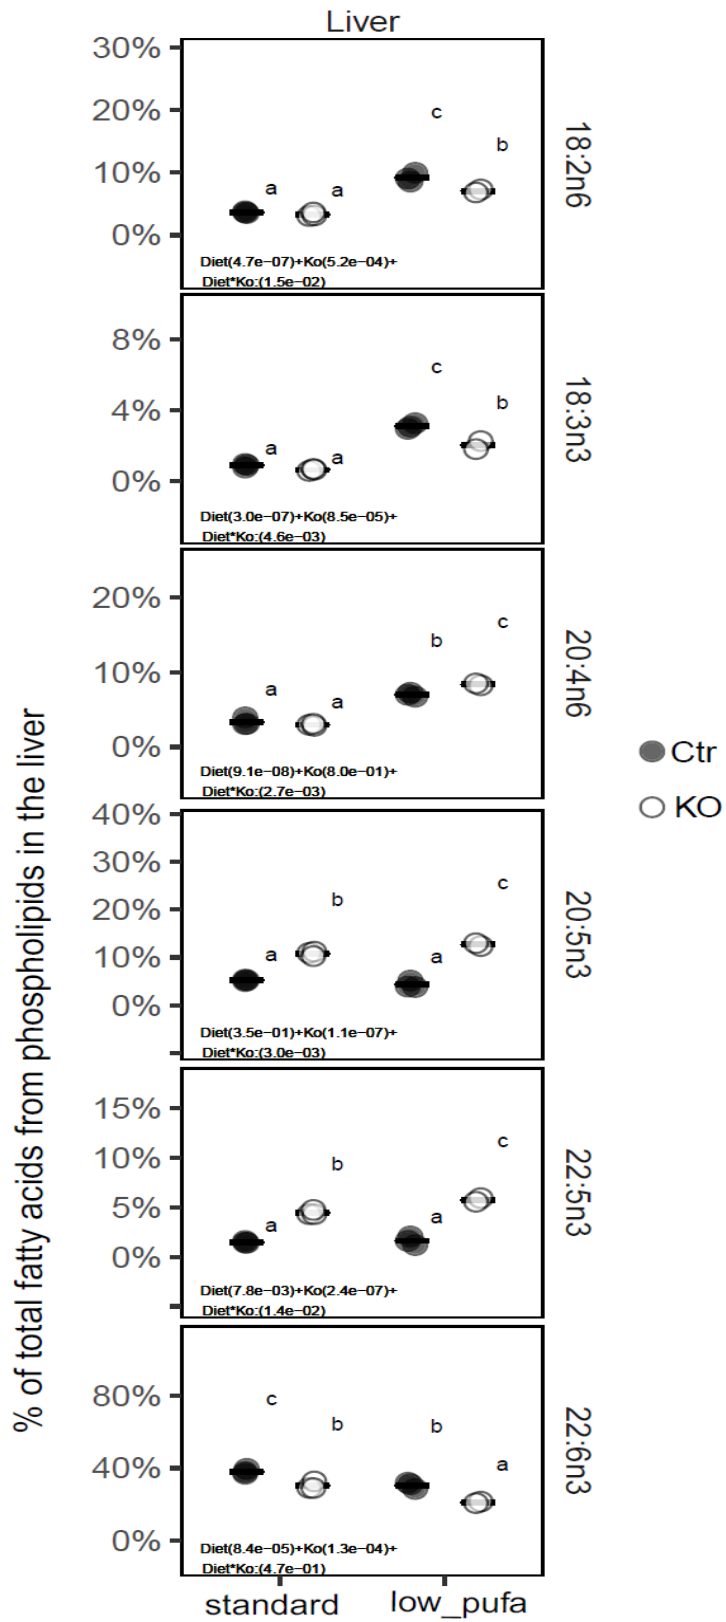

**Supplemental figure 1:** Polyunsaturated fatty acid composition of phospholipid pool in the liver of wildtype controls (Ctr or WT) and *elovl2* knockout (KO) salmon fed low-PUFA and standard commercial diets for 60 days. Results are shown as individual data points with n=3 for all samples except KOs under low PUFA diet with n=2, the bar represents the mean value per group. ANOVA *p*-values for diets, *elovl2* KO (Ko/WT) as well as interaction (Diet\*Ko) are indicated in the figure. Groups with different letters are significantly different from each other (*p*-value <0.05; Tukey HSD test).

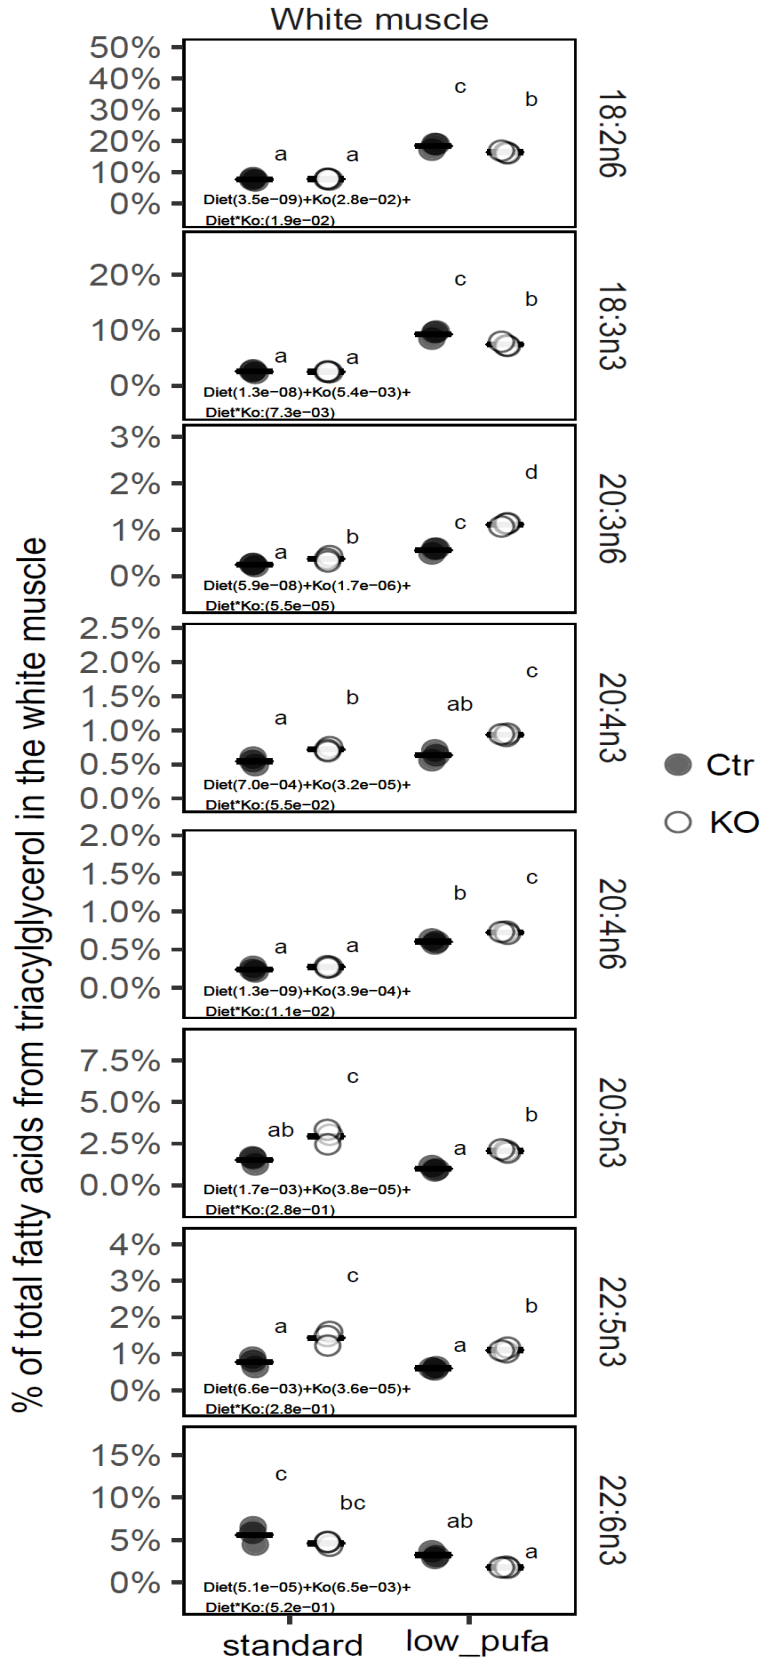

**Supplemental figure 2:** Polyunsaturated fatty acid composition of white muscle triacylglycerol of wildtypes ( Ctr or WT) and *elovl2* knockout (*elovl2* KO) salmon fed low-PUFA and standard commercial diet for 108 days. Results are shown as individual data points with n=3, the bar represents the mean value per group. ANOVA *p*-values for diets, *elovl2* KO (Ko/WT) as well as interaction (Diet\*Ko) are indicated in the figure. Groups with different letters are significantly different from each other (*p*-value <0.05; Tukey HSD test).

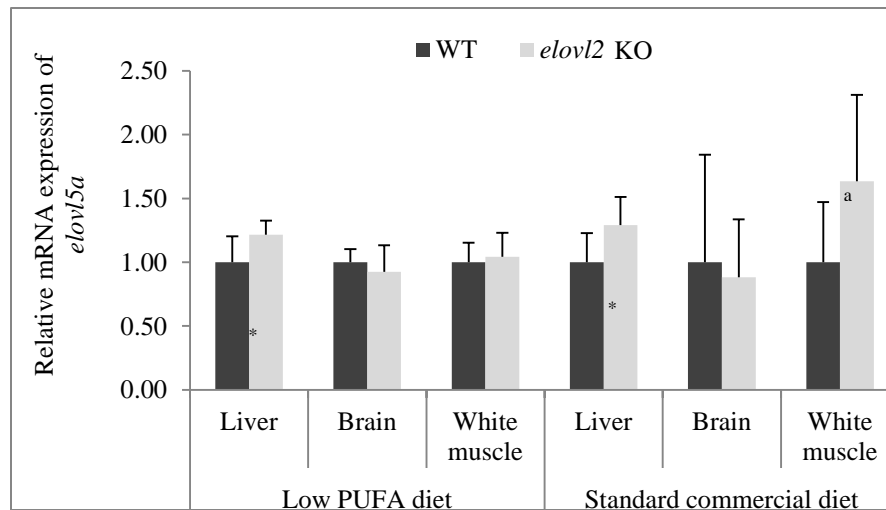

**Supplemental figure 3:** Relative mRNA expression levels of *elovl5a* in the liver, brain and white muscle in wildtype (WT) and *elovl2* knockout (*elovl2* KO) salmon fed low-PUFA and standard commercial diet for 108 days. Results are represented as mRNA expression in *elovl2* KO relative to wildtype (WT), with the WT set to 1. All qPCR data were analysed using qBase+<sup>56</sup> which determined statistical differences between WT and *elovl2* KO using unpaired Mann-Whitney test with two-sided significance. Data are presented as means  $\pm$  standard error (S.E) with n =7-13 pooled from tanks fed low PUFA and n = 3-5 for standard commercial diet. Statistical differences between WT and *elovl2* KO sampled under each diet is denoted by asterisk (\* $p < 0.05$ , a = 0.056). Normalization was performed using elongation factor-1 $\alpha$ -b (*ef1 $\alpha$ -b*) as housekeeping gene. The expression levels of *elov5b* are not included due to high variations between biological replicates especially in the white muscle.

**Supplemental table 1:** Fatty acid composition (% of total fatty acids) of experimental diets

|                        | <b>Low PUFA diet</b>          | <b>Standard commercial diet</b> |
|------------------------|-------------------------------|---------------------------------|
| <b>Fatty acids</b>     | <b>% of total fatty acids</b> | <b>% of total fatty acids</b>   |
| <b>Saturates</b>       |                               |                                 |
| 14:00                  | 2.31                          | 3.53                            |
| 16:00                  | 11.67                         | 11.54                           |
| 18:00                  | 3.42                          | 2.01                            |
| <b>Monoenes</b>        |                               |                                 |
| 16:1n7                 | 1.91                          | 3.16                            |
| 18:1n7                 | 2.21                          | 2.52                            |
| 18:1n9                 | 24.48                         | 29.7                            |
| 22:1n9                 | 0.23                          | 6.98                            |
| <b>n-6 fatty acids</b> |                               |                                 |
| 18:2n6                 | 22.51                         | 10.75                           |
| 20:4n6                 | 1.33                          | 0.32                            |
| <b>n-3 fatty acids</b> |                               |                                 |
| 18:3n3                 | 17.01                         | 4.86                            |
| 20:5n3                 | 3.78                          | 5.4                             |
| 22:6n3                 | 2.95                          | 7.3                             |

**Supplemental table 2:** Weight and length of *elov12* knockouts (KOs) and wildtypes (WTs) after 60 and 108 days of feeding trials

| Diets           | 108 days of feeding trial |            |             | 60 days of feeding trial |            |             |
|-----------------|---------------------------|------------|-------------|--------------------------|------------|-------------|
|                 | Experimental fish         | Weight (g) | Length (cm) | Experimental fish        | Weight (g) | Length (cm) |
| <b>LOW PUFA</b> | KO1                       | 90         | 18.3        | KO1                      | 64         | 16.7        |
|                 | KO2                       | 102        | 19.4        | KO2                      | 48         | 15.4        |
|                 | KO3                       | 94         | 18.4        | KO3                      | 48         | 15.5        |
|                 | KO4                       | 112        | 19.4        | KO4                      | 81         | 18          |
|                 | KO5                       | 118        | 19.6        | KO5                      | 82         | 18.5        |
|                 | KO6                       | 80         | 17.6        | KO6                      | 81         | 17.5        |
|                 | KO7                       | 108        | 20.1        | KO7                      | 58         | 16.6        |
|                 | KO8                       | 108        | 19.4        | KO8                      | 59         | 16.5        |
|                 | KO9                       | 76         | 17.4        | KO9                      | 43         | 14.1        |
|                 | KO10                      | 104        | 19.1        | -                        | -          | -           |
|                 | KO11                      | 108        | 19.2        | -                        | -          | -           |
|                 | KO12                      | nd         | nd          | -                        | -          | -           |
|                 | KO13                      | 98         | 18.6        | -                        | -          | -           |
|                 | WT1                       | 102        | 19.9        | WT1                      | 59         | 16.6        |
|                 | WT2                       | 104        | 19.7        | WT2                      | 74         | 17.5        |
|                 | WT3                       | 88         | 18.2        | WT3                      | 53         | 16.1        |
|                 | WT4                       | 126        | 21.6        | WT4                      | 63         | 17          |
|                 | WT5                       | 130        | 21.6        | WT5                      | 62         | 16.7        |
|                 | WT6                       | 96         | 19.3        | WT6                      | 68         | 17          |
|                 | WT7                       | 78         | 18          | WT7                      | 90         | 19          |
|                 | WT8                       | 104        | 19.3        | WT8                      | 75         | 17.7        |
|                 | WT9                       | 116        | 21.1        | WT9                      | 66         | 17.5        |
|                 | WT10                      | 88         | 18.6        | -                        | -          | -           |
|                 | WT11                      | 144        | 22.1        | -                        | -          | -           |
|                 | WT12                      | 96         | 19.1        | -                        | -          | -           |
|                 | WT13                      | 100        | 20.1        | -                        | -          | -           |
| <b>Standard</b> | KO1                       | 100        | 17.8        | KO1                      | 103        | 19.4        |
|                 | KO2                       | 112        | 20.6        | KO2                      | 79         | 17.7        |
|                 | KO3                       | 142        | 21.3        | KO3                      | 91         | 19.1        |
|                 | KO4                       | 142        | 21.3        | KO4                      | 76         | 18          |
|                 | KO5                       | 88         | 18.3        | KO5                      | 82         | 18.2        |
|                 | KO6                       | 118        | 20.6        | -                        | -          | -           |
|                 | WT1                       | 148        | 22.7        | WT1                      | 67         | 17.2        |
|                 | WT2                       | 146        | 22.7        | WT2                      | 80         | 18          |
|                 | WT3                       | 150        | 22.3        | WT3                      | 68         | 17.3        |
|                 | WT4                       | 154        | 22.4        | WT4                      | 82         | 18.3        |
|                 | WT5                       | 116        | 20.2        | WT5                      | 71         | 17.3        |
|                 | WT6                       | 130        | 20.6        | -                        | -          | -           |



**Supplemental table 3:** Correlation between CRISPR-induced lesions in *slc45a2* and *elovl2*

| Total number of albinos screened | Number of albinos with CRISPR-lesions in <i>elovl2</i> | Number of mosaics <sup>‡</sup> |
|----------------------------------|--------------------------------------------------------|--------------------------------|
| 46                               | 46                                                     | 8                              |

**Mosaics<sup>‡</sup>:** Albino fish containing both mutant and wildtype *elovl2* allele(s)

**Supplemental table 5:** *slc45a2* and *elovl2* target sequences and oligonucleotides

| Name                     | Sequence                                   |
|--------------------------|--------------------------------------------|
| <i>slc45a2</i> target    | 5'-GGGGAACAGGCCGATAAGACT <u>TGG</u> -3'**  |
| <i>slc45a2</i> -F        | 5'-TAGGGGAACAGGCCGATAAGAC-3'               |
| <i>slc45a2</i> -R        | 5'-AAACGTCTTATCGGCCTGTTCC-3'               |
| <i>elovl2</i> target 1   | 5'-GGCAGGGGAGGCCGACCTC <u>AGG</u> -3'**    |
| <i>elovl2</i> target 1-F | 5'-TAGGCAGGGGAGGCCGACCTCA-3'               |
| <i>elovl2</i> target 1-R | 5'-AAACTGAGGTCCGCCTCCCCTG-3'               |
| <i>elovl2</i> target 2   | 5'-GGTGGAAAGCGGTACCTGACTC <u>AGG</u> -3'** |
| <i>elovl2</i> target 2-F | 5'-TAGGTGGAAGCGGTACCTGACTC-3'              |
| <i>elovl2</i> target 2-R | 5'-AAACGAGTCAGGTACCGCTTCCA-3'              |
| <i>elovl2</i> target 3   | 5'- <u>CCCC</u> GTCGGATGCCTGCTCTTCC-3'     |
| <i>elovl2</i> target 3-F | 5'-TAGGAAGAGCAGGCATCCGACG-3'               |
| <i>elovl2</i> target 3-R | 5'-AAACCGTCGGATGCCTGCTCTT-3'               |

\*\* Underlined trinucleotides are CRISPR-PAM sites

**Supplemental table 6:** PCR primers used in target site amplification

| Name                        | Sequence                     |
|-----------------------------|------------------------------|
| <i>elovl2</i> target 1-PCRf | 5'-TGCCTCAGCTCAGTCAGTCAGG-3' |
| <i>elovl2</i> target 1-PCRr | 5'-AGAGCCCAACACAAGTGTTACT-3' |
| <i>elovl2</i> target 2-PCRf | 5'-ACTGTAGTTGTGTTGCCTTGG-3'  |
| <i>elovl2</i> target 2-PCRr | 5'-ACGTAACAAAGAACATGGTCG-3'  |
| <i>elovl2</i> target 3-PCRf | 5'-TAGTCTAAGAGCAACGGCCTAC-3' |
| <i>elovl2</i> target 3-PCRr | 5'-CCCCAAGGCGTTACTGTACCTG-3' |

**Supplemental table 7** RT-qPCR Primers

| <b>Primer</b>   | <b>Forward primer 5'-3'</b> | <b>Reverse primer 5'-3'</b> | <b>Accession no.</b> |
|-----------------|-----------------------------|-----------------------------|----------------------|
| <i>srebp-1</i>  | GCCATGCGCAGGTTGTTTCTTCA     | TCTGGCCAGGACGCATCTCACACT    | HM561860.1           |
| $\Delta 5fad$   | GTGAATGGGGATCCATAGCA        | AAACGAACGGACAACCAGA         | AF478472.3           |
| $\Delta 6fad-a$ | CCCCAGACGTTTGTGTCAG         | CCTGGATTGTTGCTTTGGAT        | AY458652.3           |
| <i>elovl5a</i>  | ACAAGACAGGAATCTCTTTCAGATTAA | TCTGGGGTTACTGTGCTATAGTGTAC  | AY170327.3           |
| <i>elovl5b</i>  | ATTGCTAGGAGAGATGTAGGAT      | GTGTGCAAAACGTTAGGAATCT      | FJ237531.1           |
| <i>fasnb</i>    | GGTAGTGCCATACAAGTGATGT      | TCAGTGGGCACCAAACATGAAC      | XM_014209529.1       |
| <i>elf1a-b</i>  | TGCCCTCCAGGATGTCTAC         | CACGGCCACAGGTACTG           | BG933853.1           |

**Supplemental table 9** Gene names and gene ids

| genename         | gene_id             |
|------------------|---------------------|
| <i>elovl2</i>    | gene40749:100192341 |
| <i>elovl4</i>    | gene32697:106571493 |
| <i>elovl5b</i>   | gene51359:100192340 |
| <i>elovl5a</i>   | gene1745:100136433  |
| $\Delta 6fad-a$  | gene46010:100136441 |
| $\Delta 5fad$    | gene46067:100136383 |
| $\Delta 6fad-b$  | gene46066:100329172 |
| $\Delta 6fad-c$  | gene46069:106584797 |
| <i>fasn-a</i>    | gene51165:106589612 |
| <i>fasn-b</i>    | gene1567:106610271  |
| <i>srebp2a-a</i> | gene7578:100502557  |
| <i>srebp2a-b</i> | gene13982:106607132 |
| <i>srebp2b</i>   | gene13993:106607120 |
| <i>srebp1a</i>   | gene8199:100502556  |
| <i>srebp1b</i>   | gene13206:100502556 |
| <i>srebp1c</i>   | gene13245:106606621 |
| <i>srebp1d</i>   | gene13281:106606632 |

**Supplemental table 10:** Percentage of liver phospholipid 16:0 and 18:0 composition after 60 and 108 days of feeding trial with low PUFA and standard diets

|          |      | Liver phospholipid after 108 days |                  | Liver phospholipid after 60 days |                  |
|----------|------|-----------------------------------|------------------|----------------------------------|------------------|
|          |      | WT                                | <i>elovl2</i> KO | WT                               | <i>elovl2</i> KO |
| Low PUFA | 16:0 | 25.6 ± 4.5                        | 22.3 ± 1.8       | 16.81 ± 1.4                      | 14.39 ± 0.6      |
|          | 18:0 | 12.2 ± 3.0                        | 11.7 ± 2.2       | 7.85 ± 0.2                       | 8.55 ± 0.3       |
| Standard | 16:0 | 18.6 ± 0.9                        | 20.3 ± 3.9       | 17.08 ± 0.6                      | 16.86 ± 0.9      |
|          | 18:0 | 5.8 ± 0.2                         | 6.9 ± 0.8        | 6.20 ± 1.3                       | 6.74 ± 0.5       |

Results are presented as mean ± standard deviation, with n = 3 for all samples except *elovl2* KO under low PUFA diet at 60 days feeding with n = 2.

**Supplemental table 11:** Lipid content per milligram of liver, whole brain and white muscle tissues after 108 days of feeding trial with low PUFA and standard diet

|           | Lipid content per mg liver tissue<br>(mg/mg) |               | Lipid content per mg white muscle<br>tissue (mg/mg) |               | Lipid content per mg brain tissue<br>(mg/mg) |               |
|-----------|----------------------------------------------|---------------|-----------------------------------------------------|---------------|----------------------------------------------|---------------|
|           | Low PUFA diet                                | Standard diet | Low PUFA diet                                       | Standard diet | Low PUFA diet                                | Standard diet |
|           | <b><i>elovl2</i> KO</b>                      | 0.050 ± 0.006 | 0.042 ± 0.004                                       | 0.024 ± 0.008 | 0.030 ± 0.010                                | 0.134 ± 0.021 |
| <b>WT</b> | 0.045 ± 0.003                                | 0.038 ± 0.002 | 0.031 ± 0.009                                       | 0.027 ± 0.005 | 0.079 ± 0.022                                | 0.099 ± 0.024 |

Results are presented as mean ± standard deviation of n = 3.
